# Supplementary material for: Colored Motifs Reveal Computational Building Blocks in the C. elegans Brain
Source: PubMed Central journal article supplement (PMC3049772; doi:10.1371/journal.pone.0017013), 2011-03-07

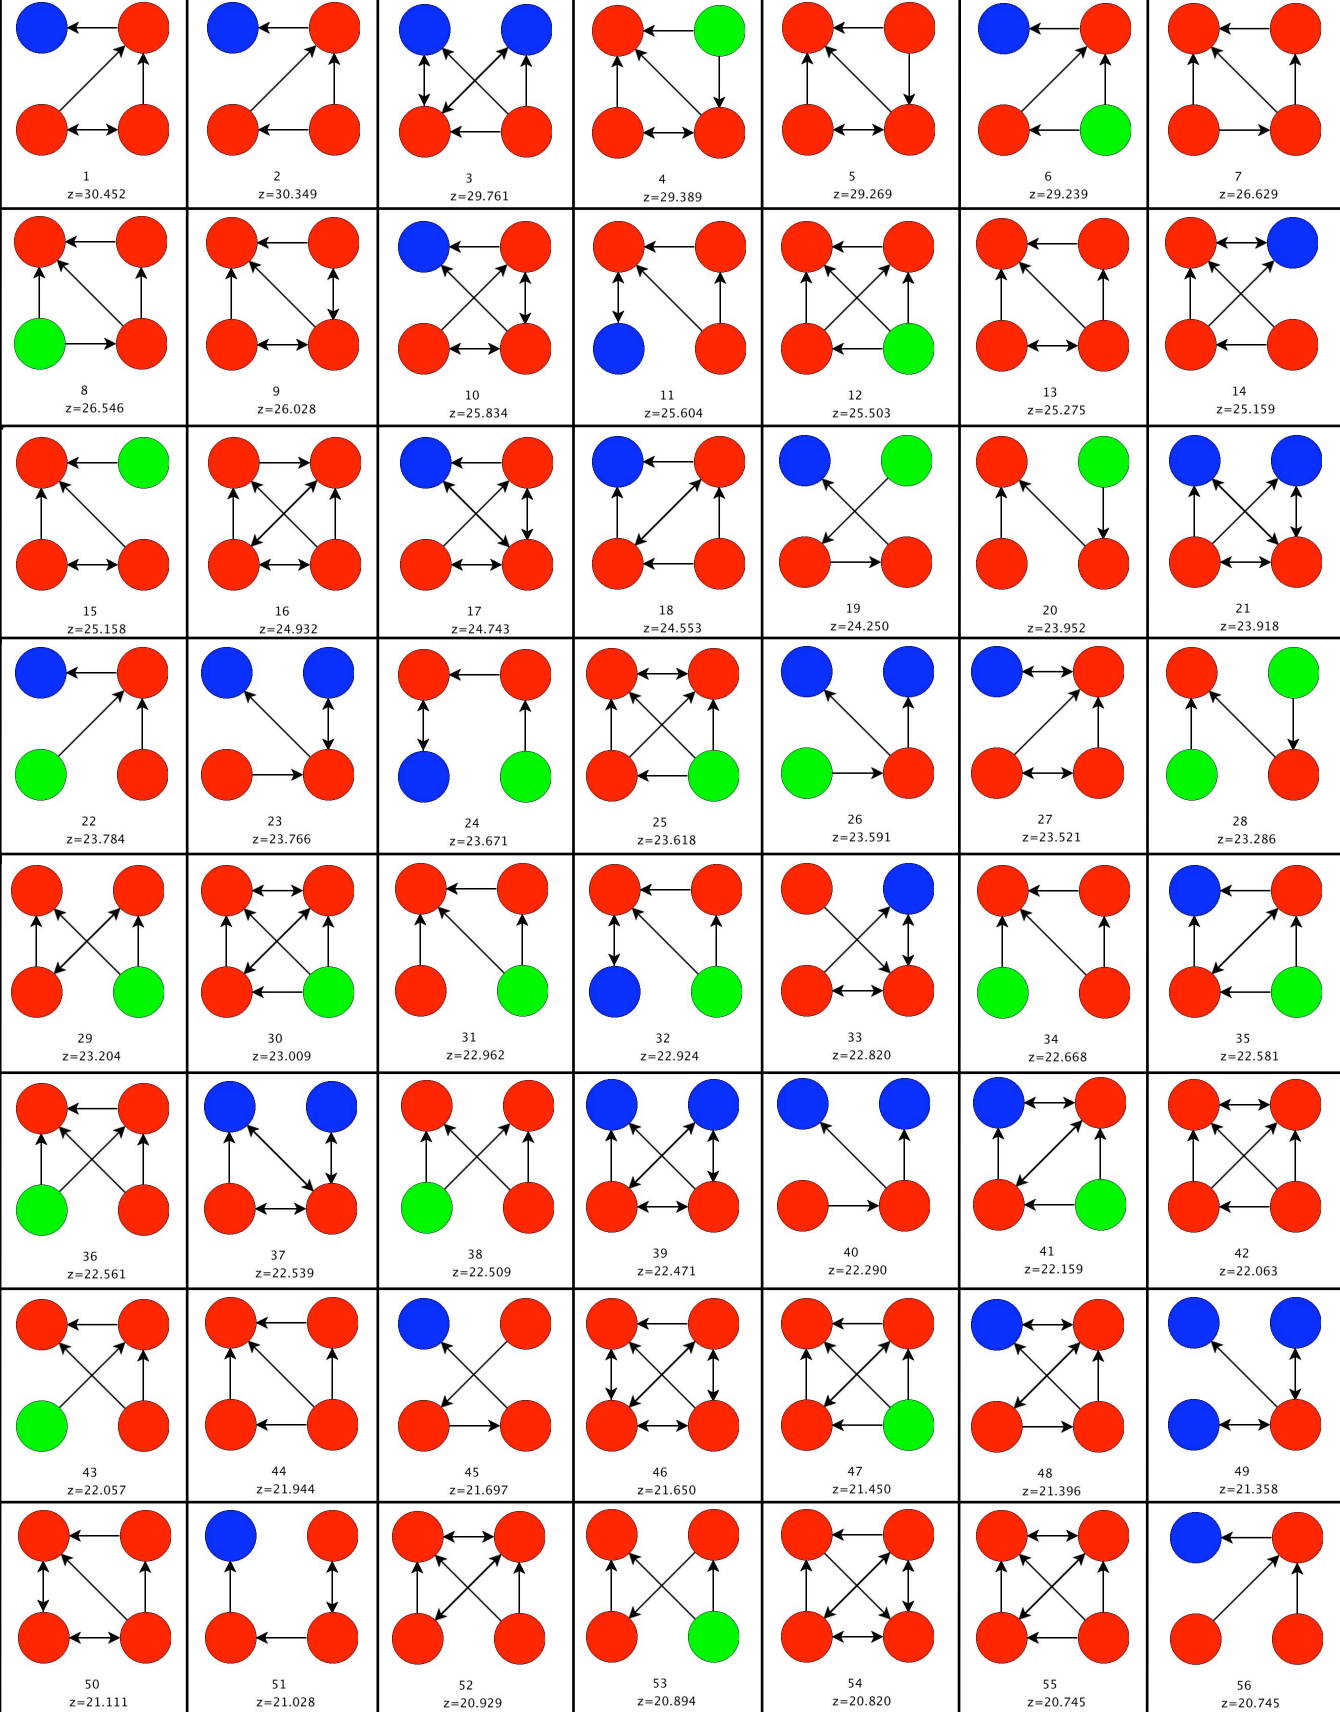

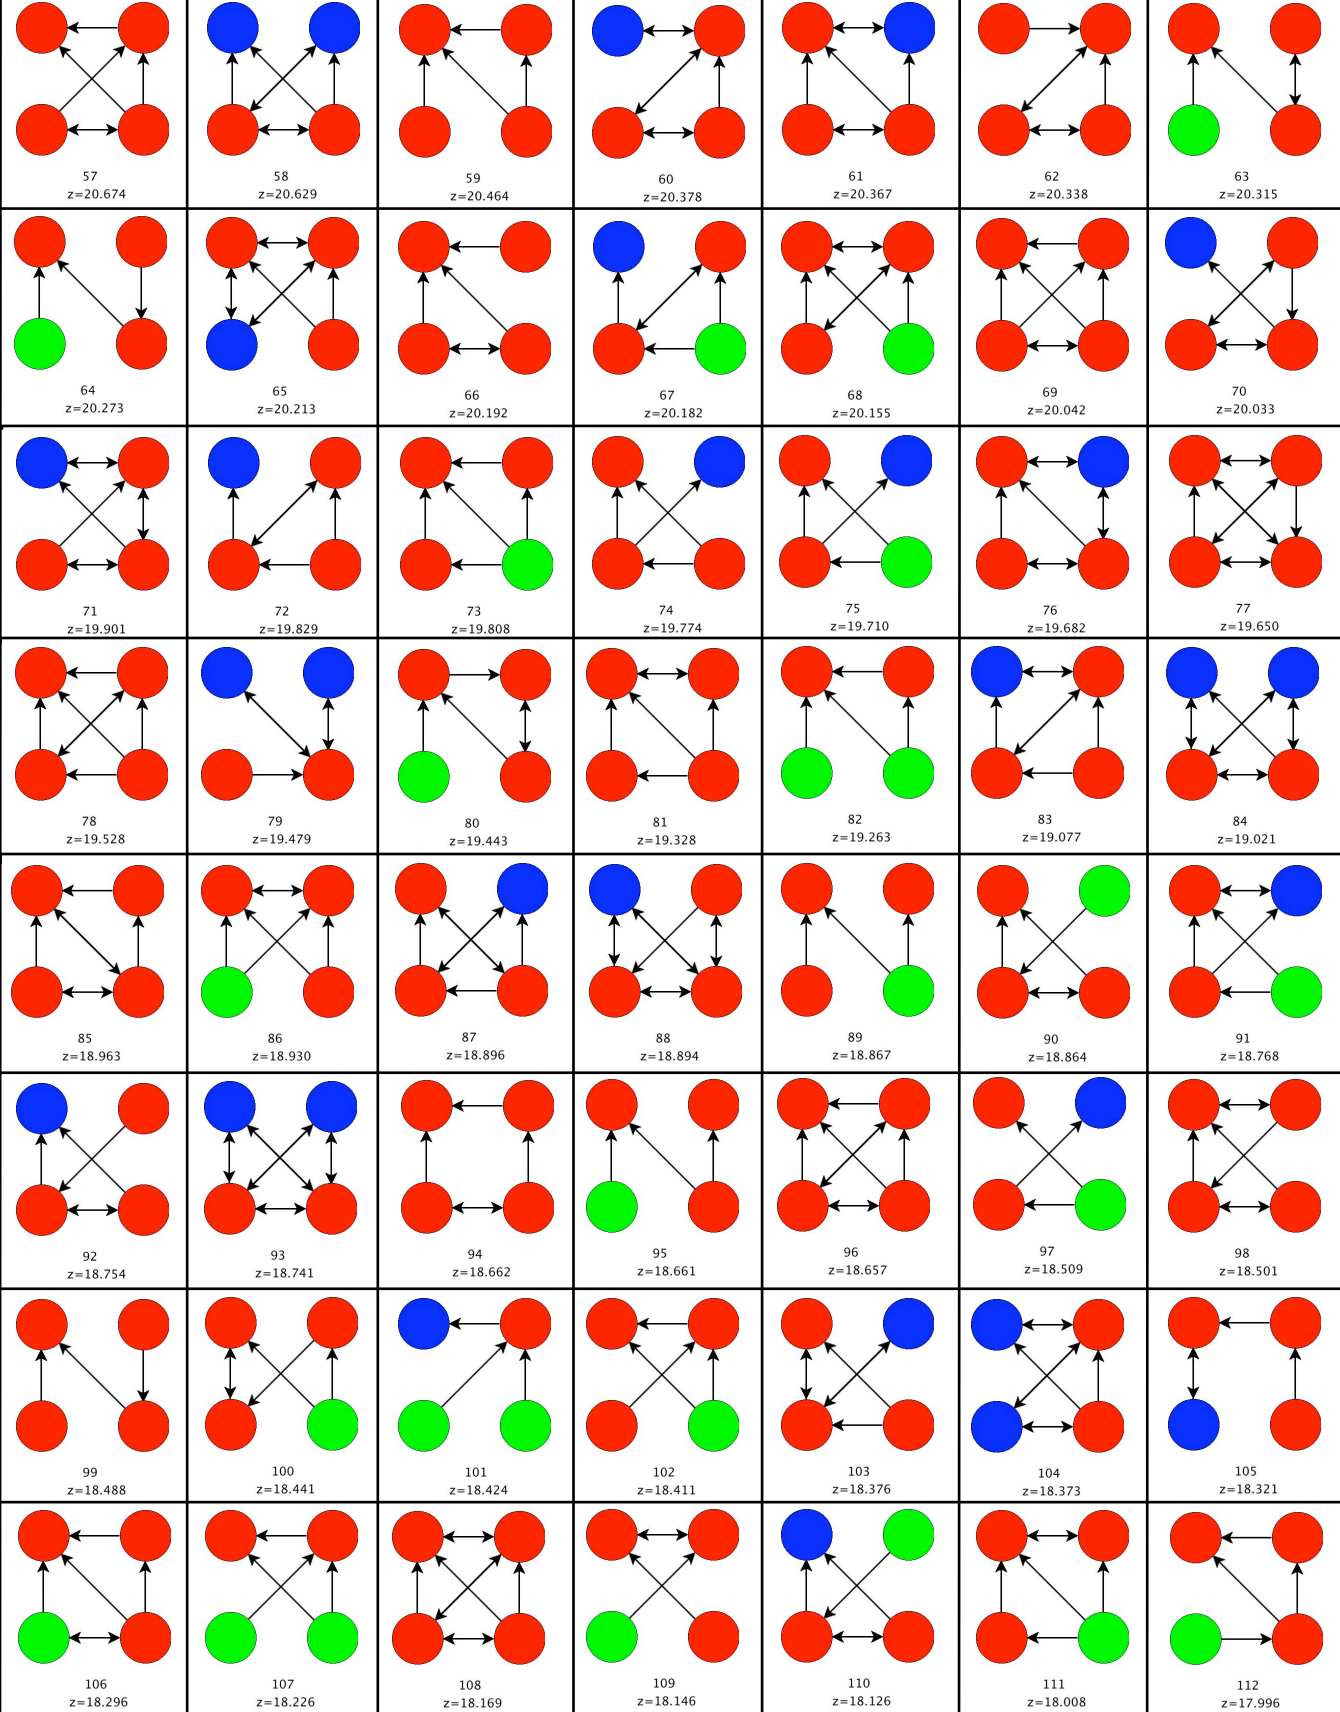

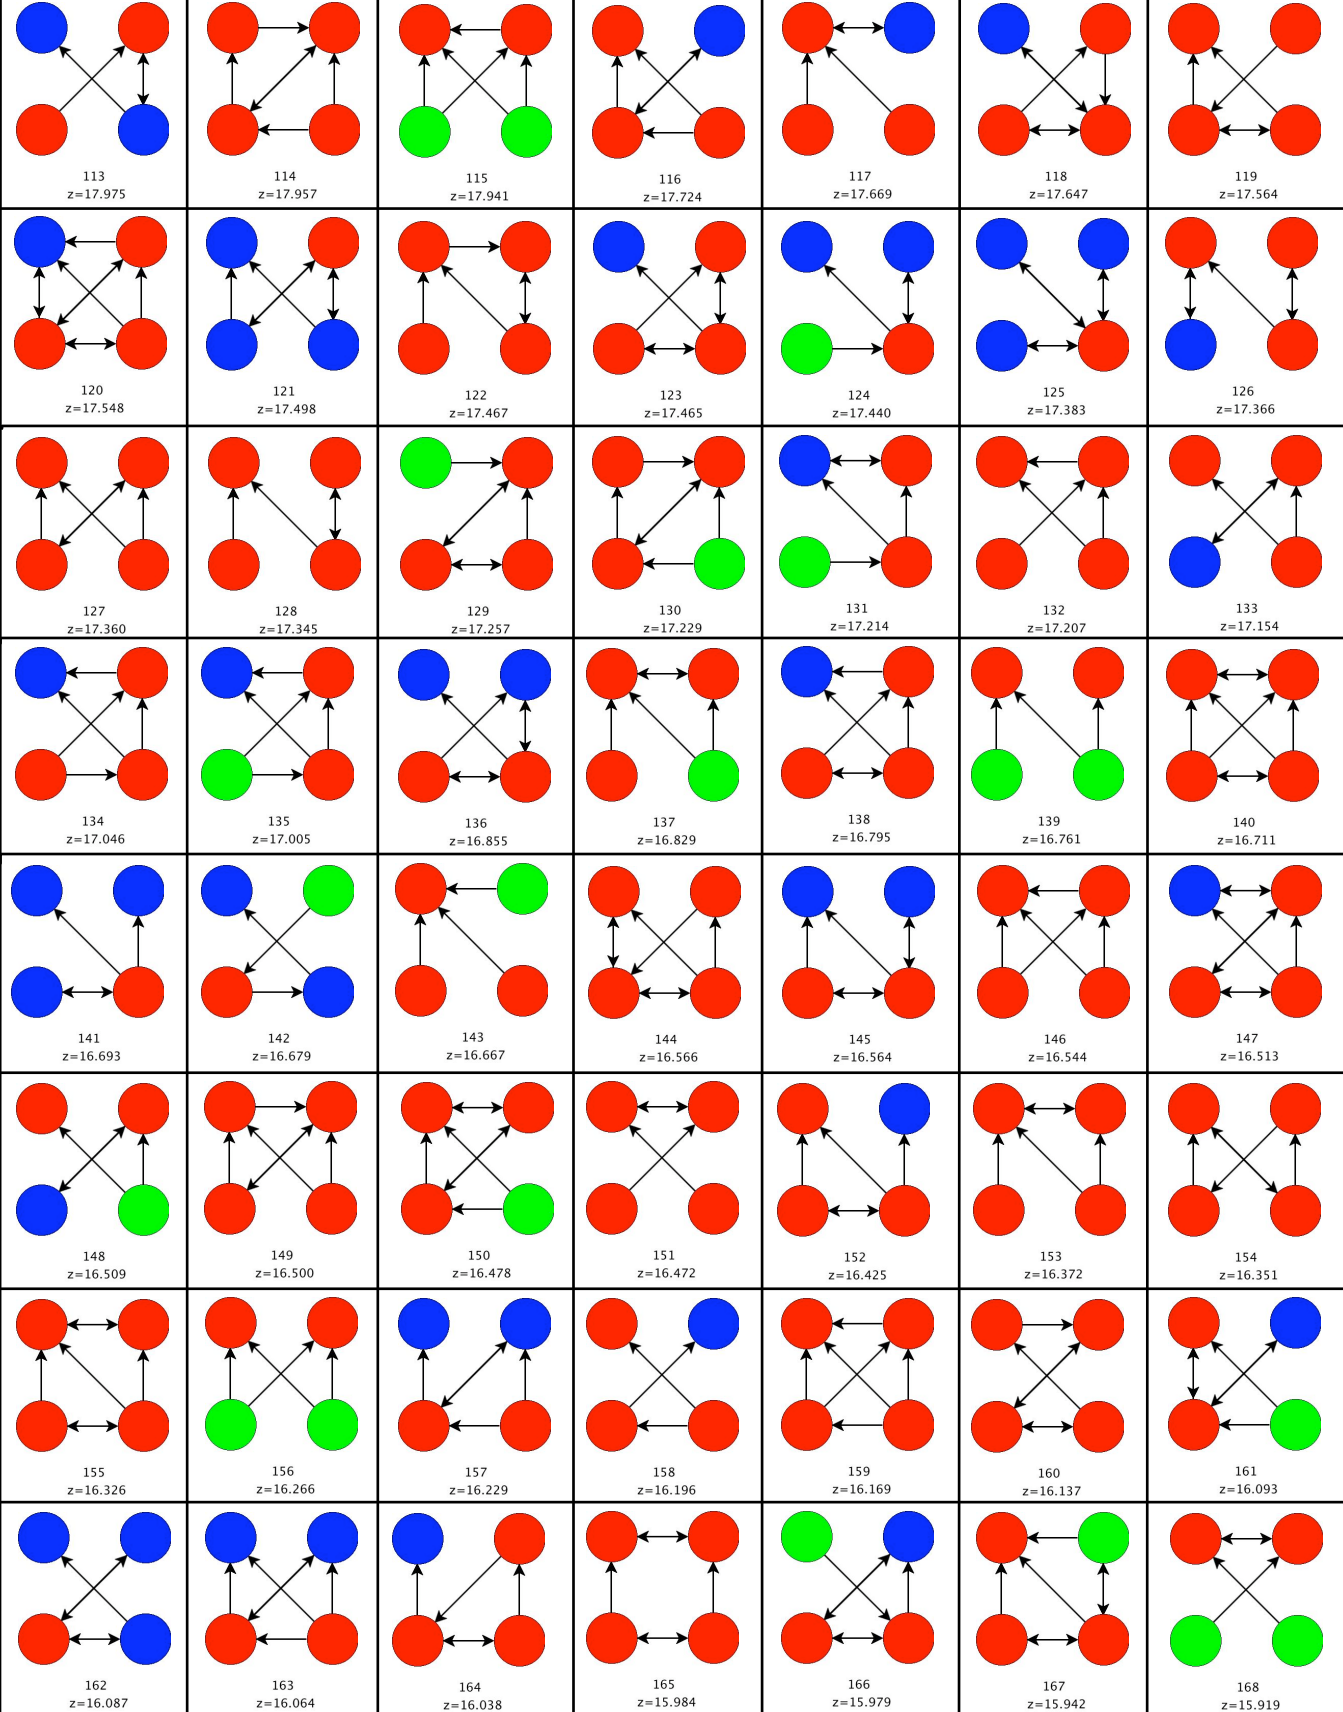

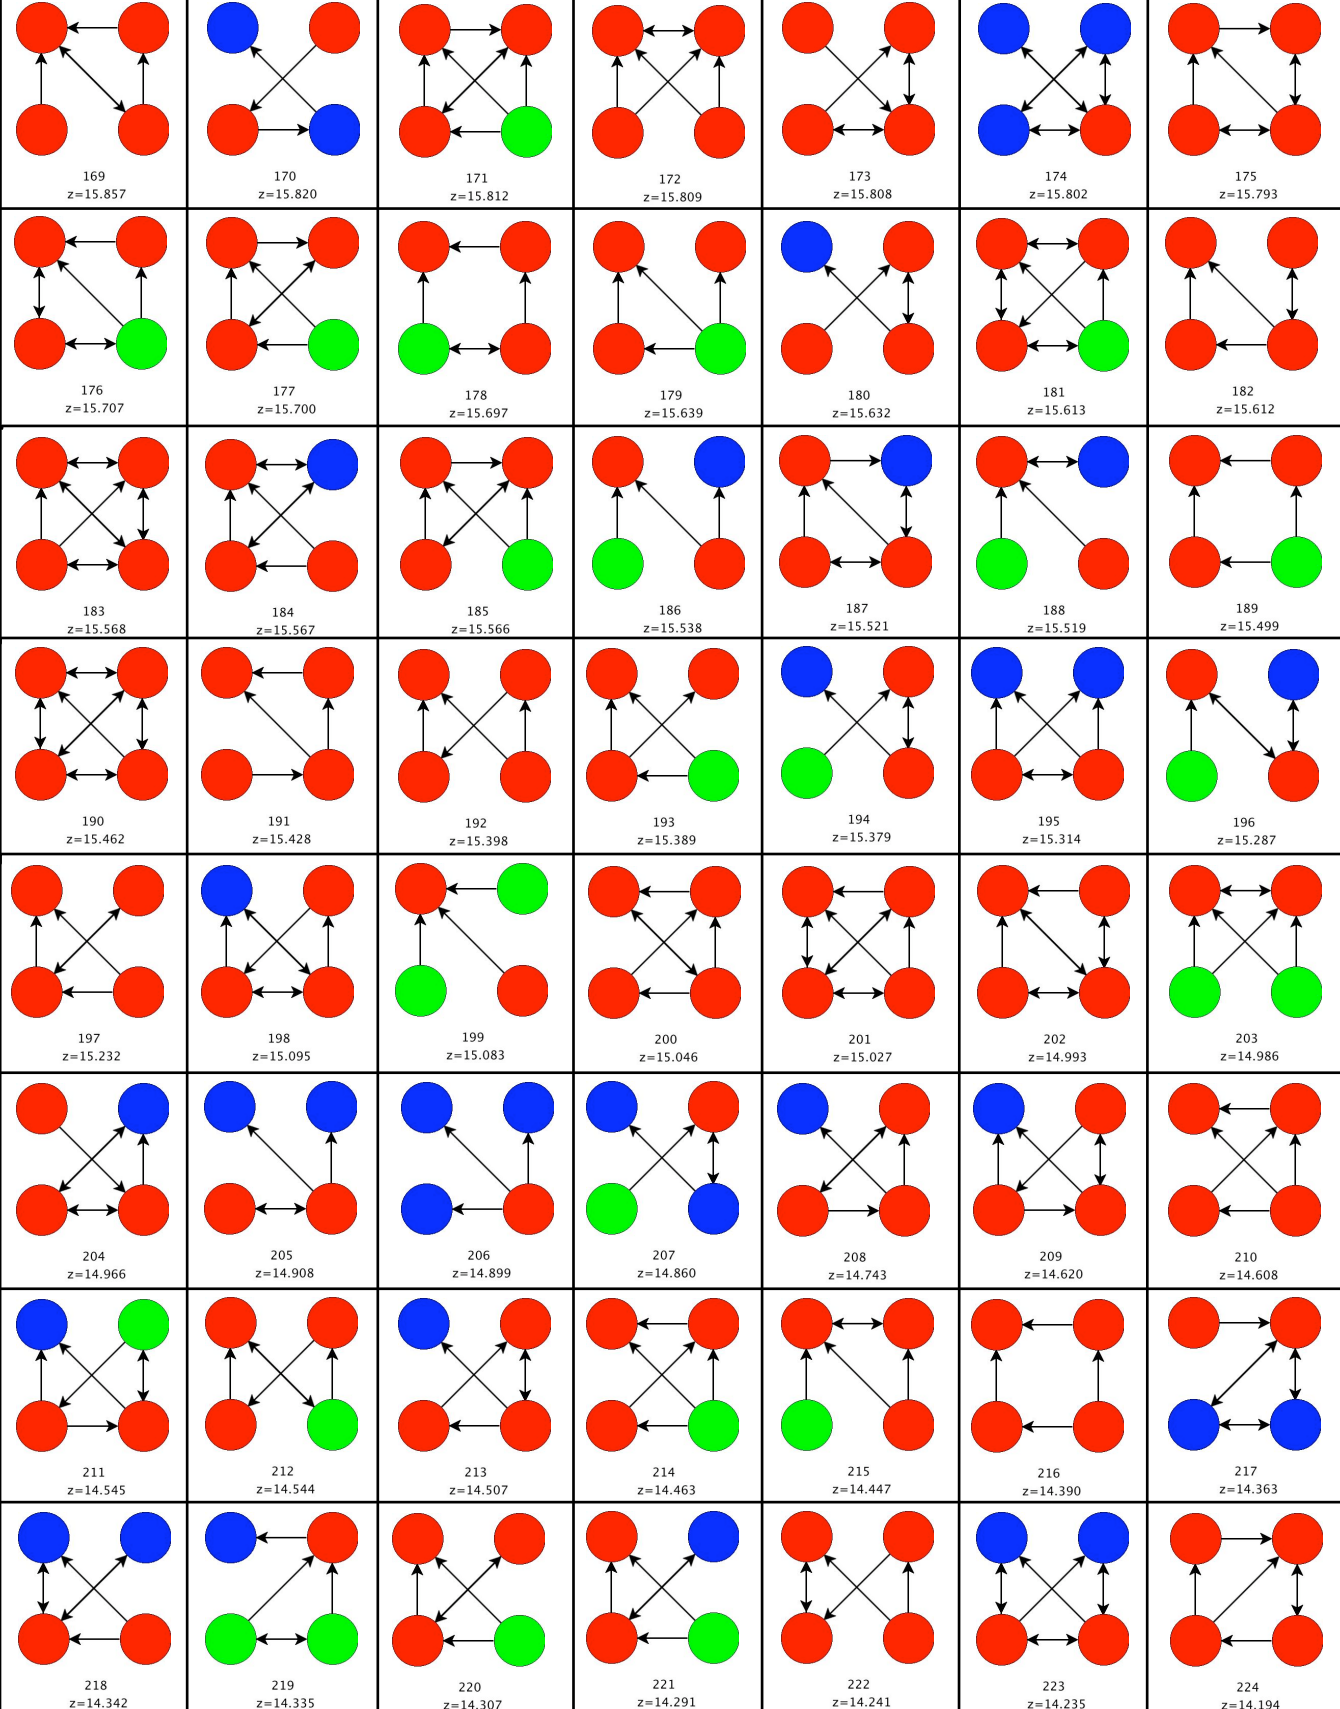

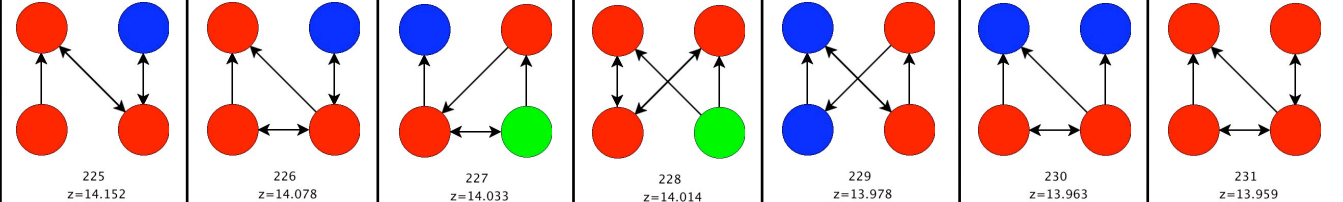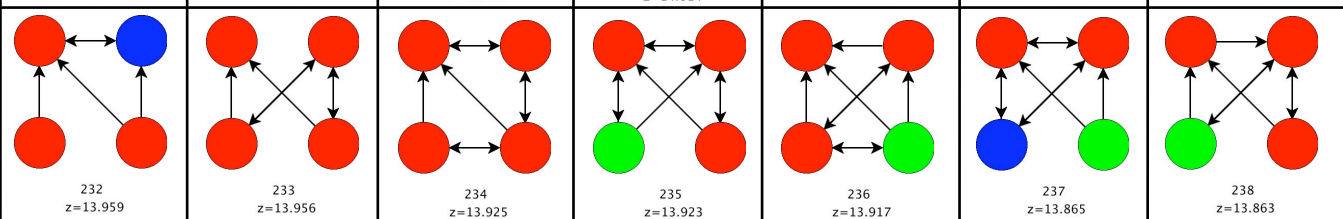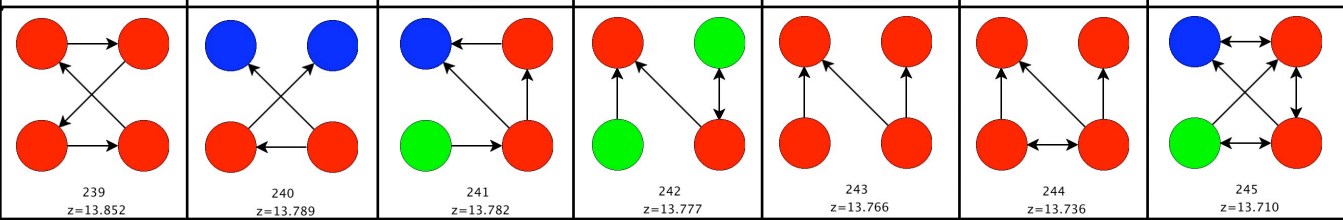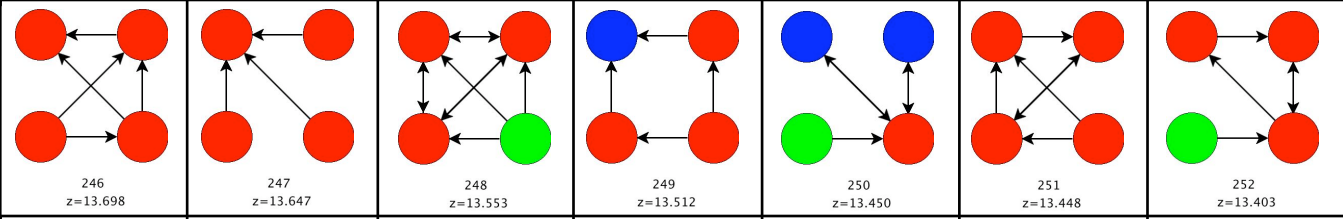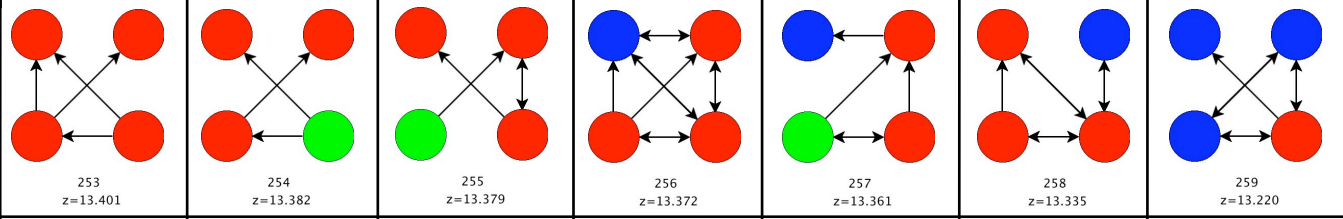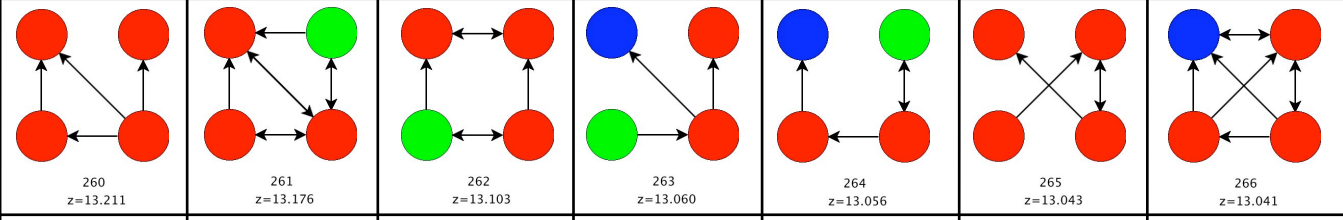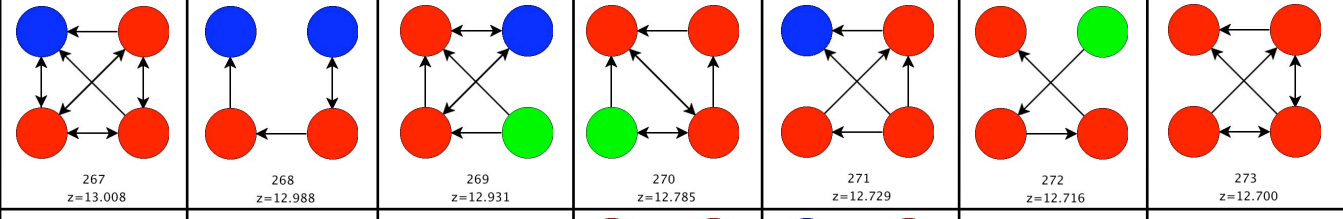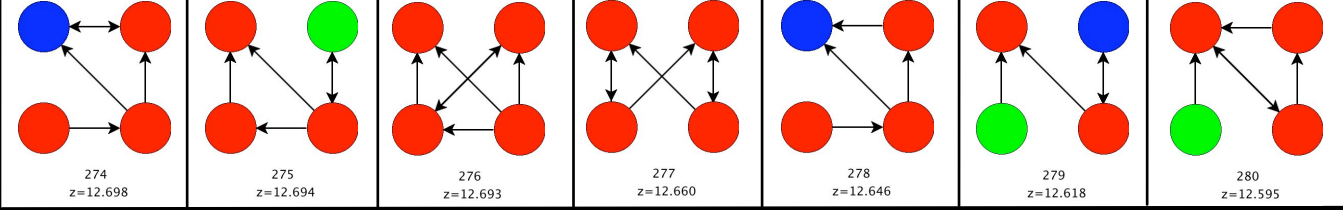

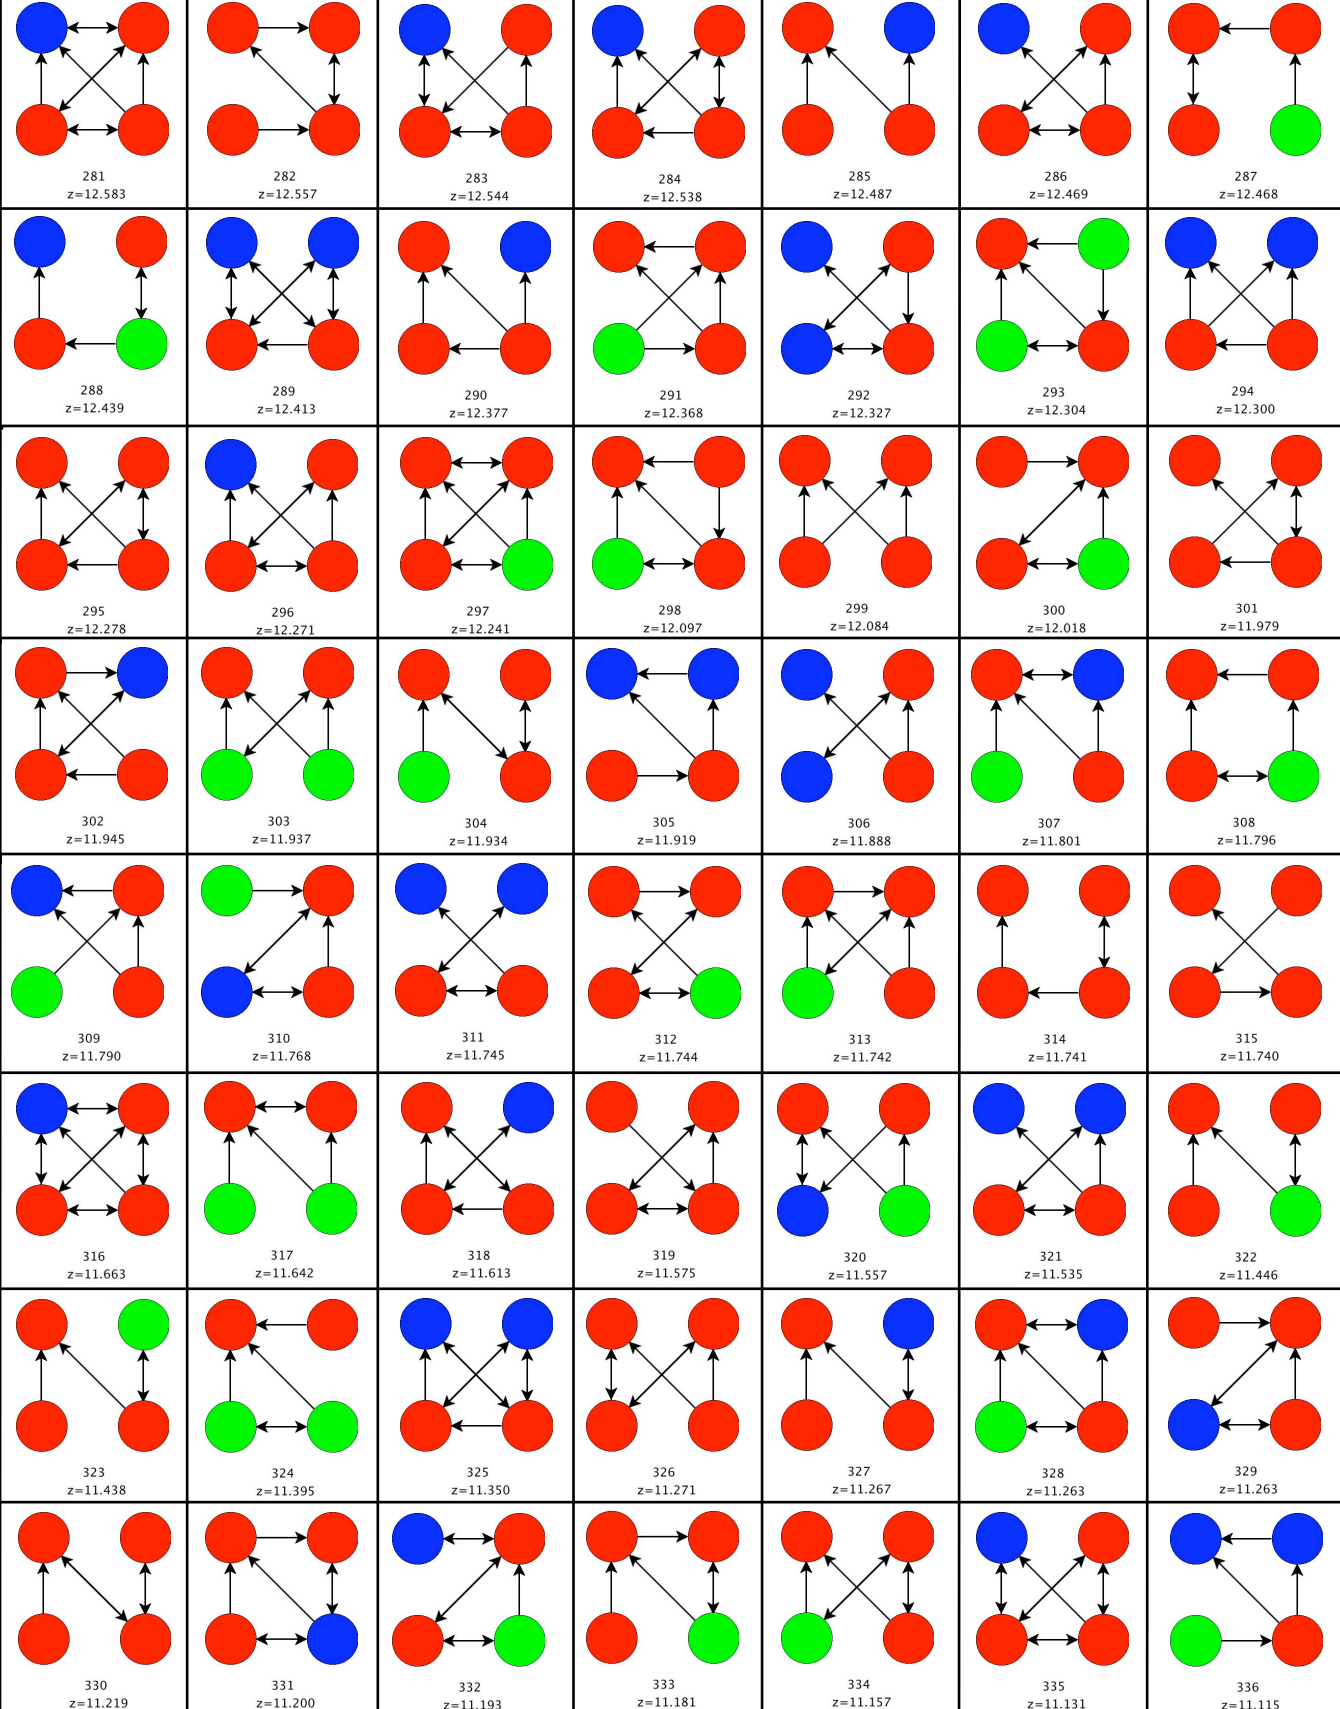

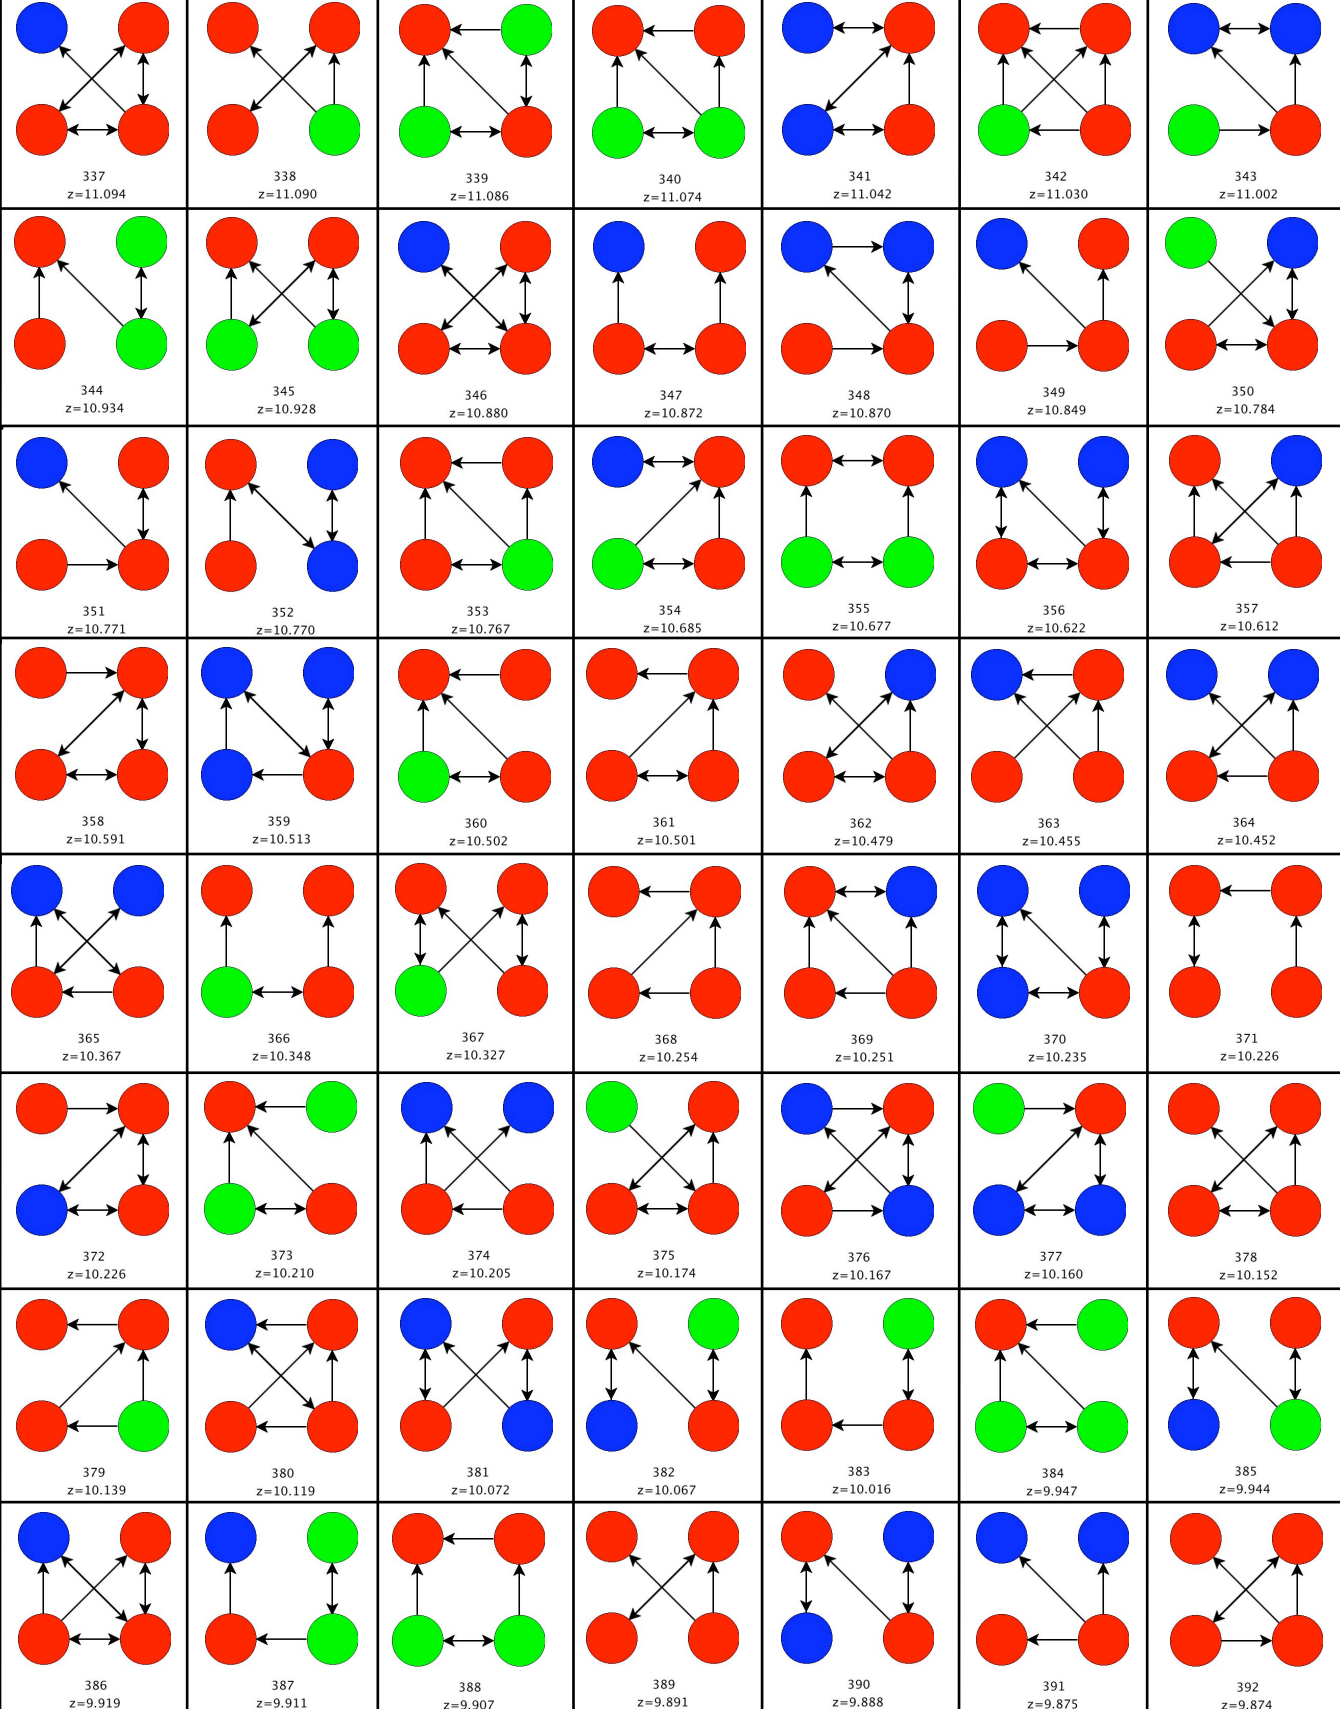

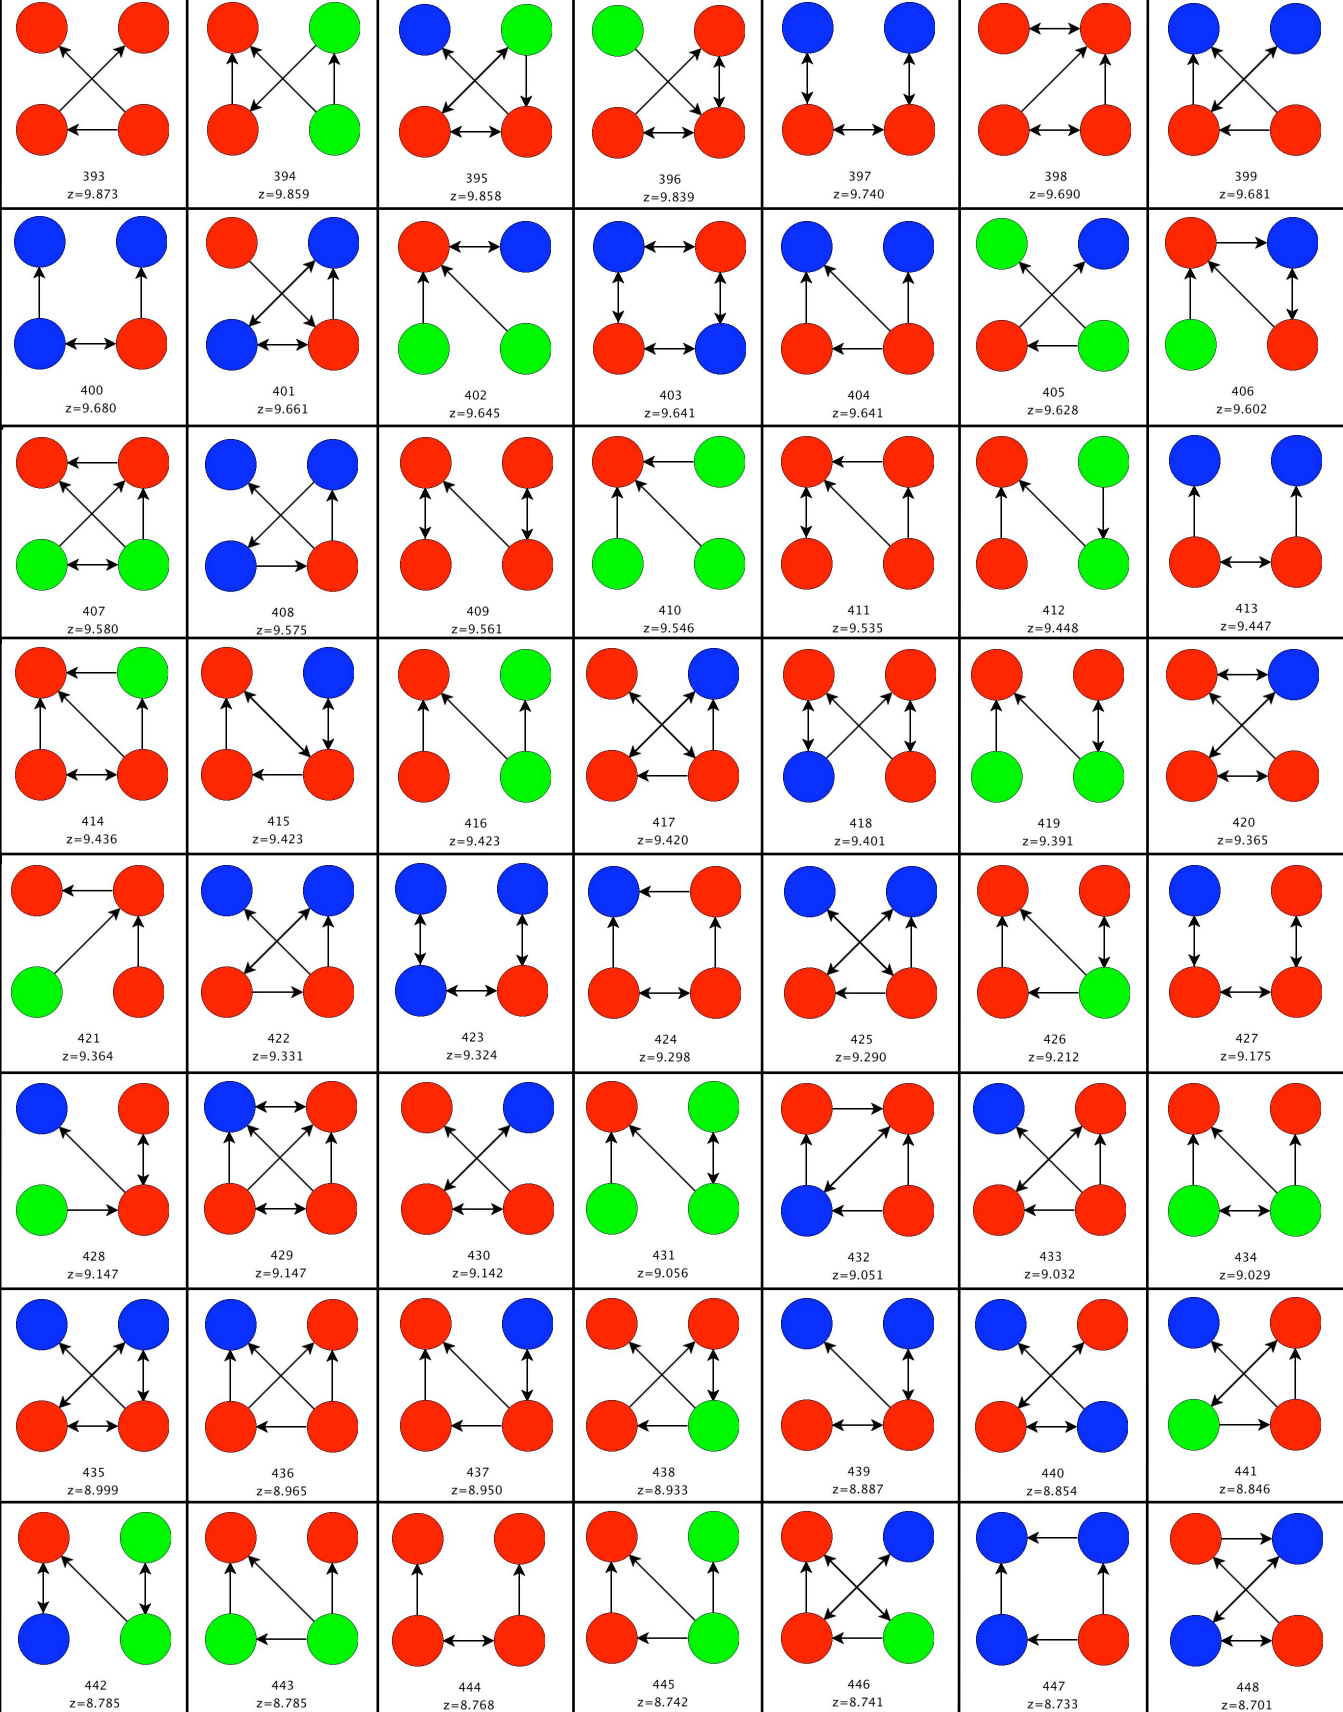



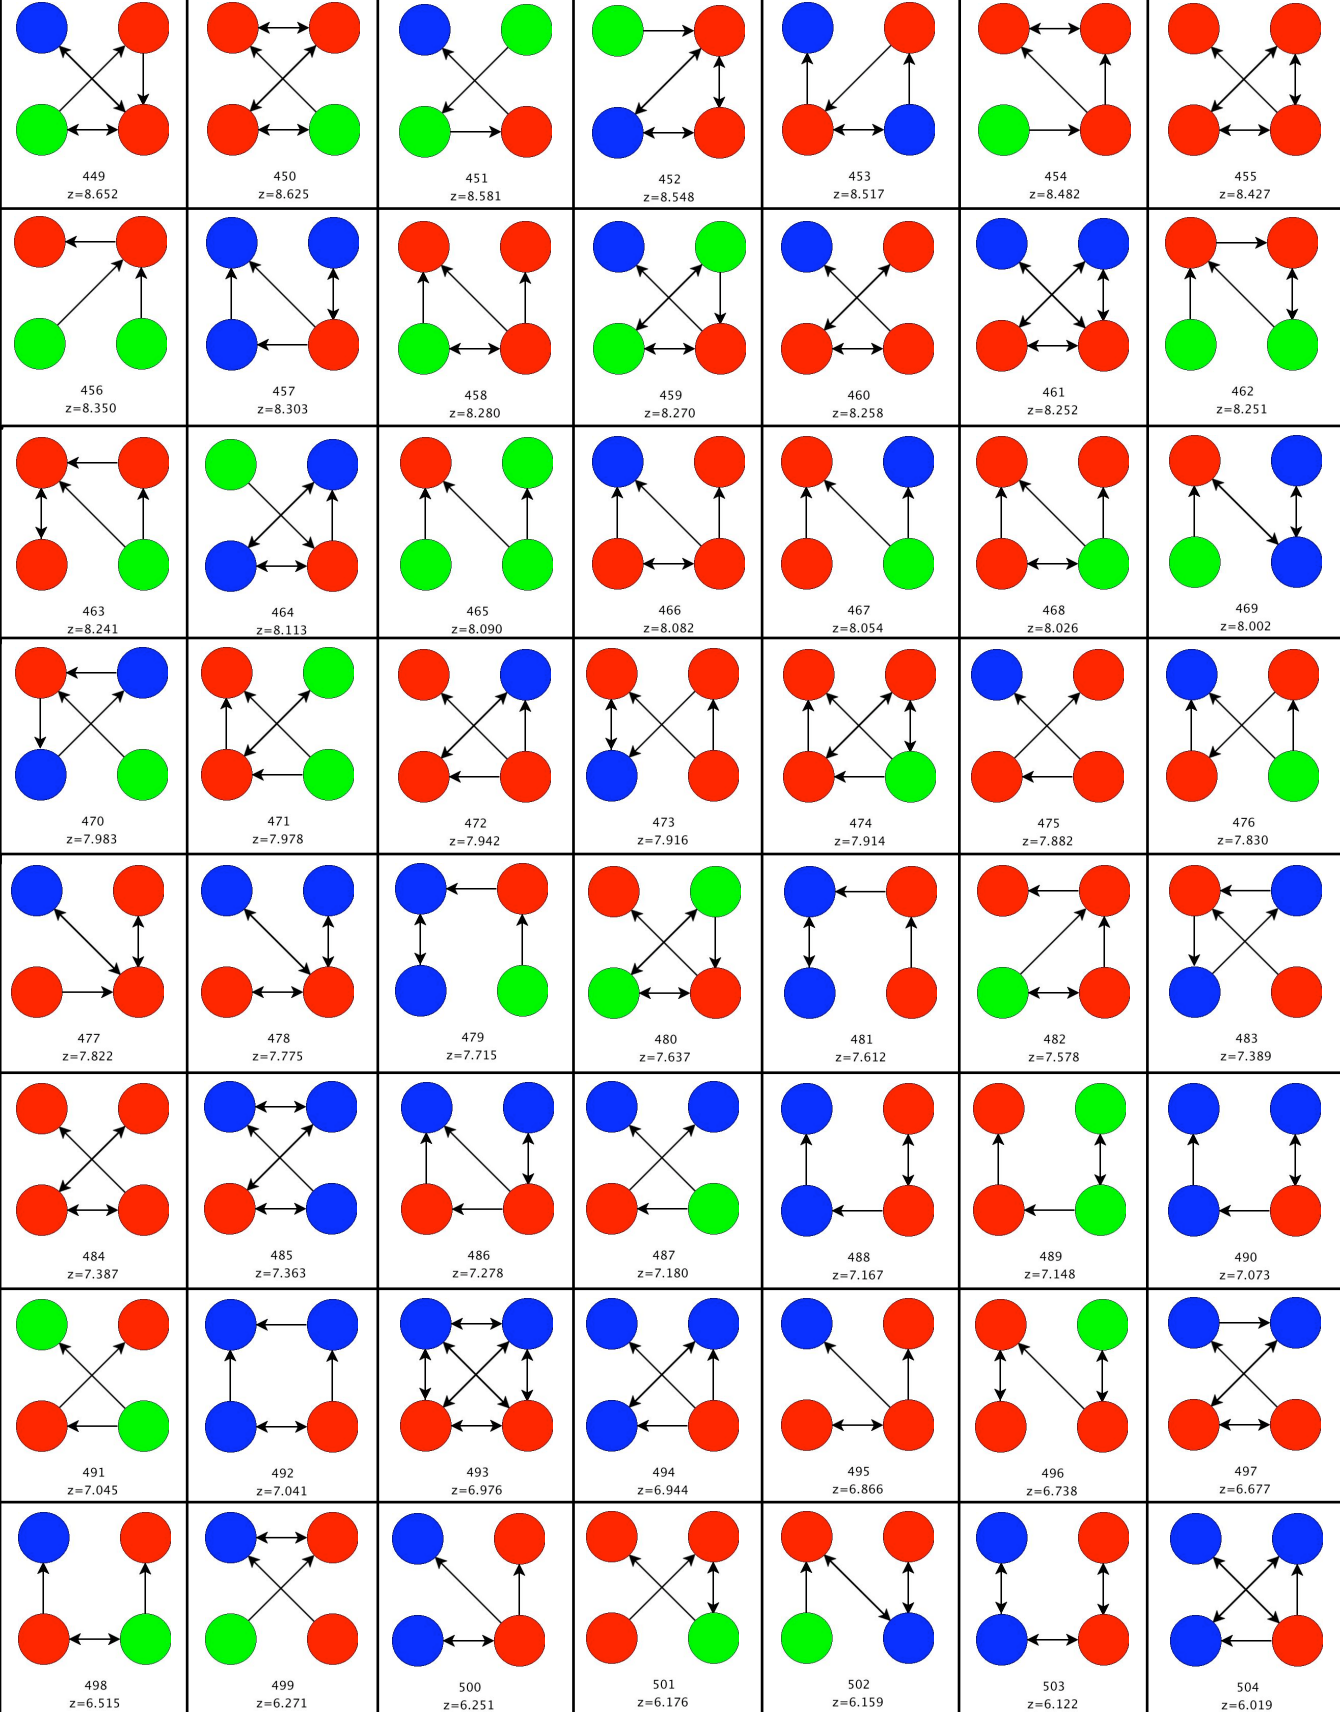

Supplement: pone.0017013.s002.pdf [file pone.0017013.s002.pdf]
